# Supplementary material for: Deep learning-based smart speaker to confirm surgical sites for cataract surgeries: A pilot study
Source: PubMed Central journal article supplement (PMC7144990; doi:10.1371/journal.pone.0231322), 2020-04-09

S2 Fig. Dataset distribution in the training and validation set.

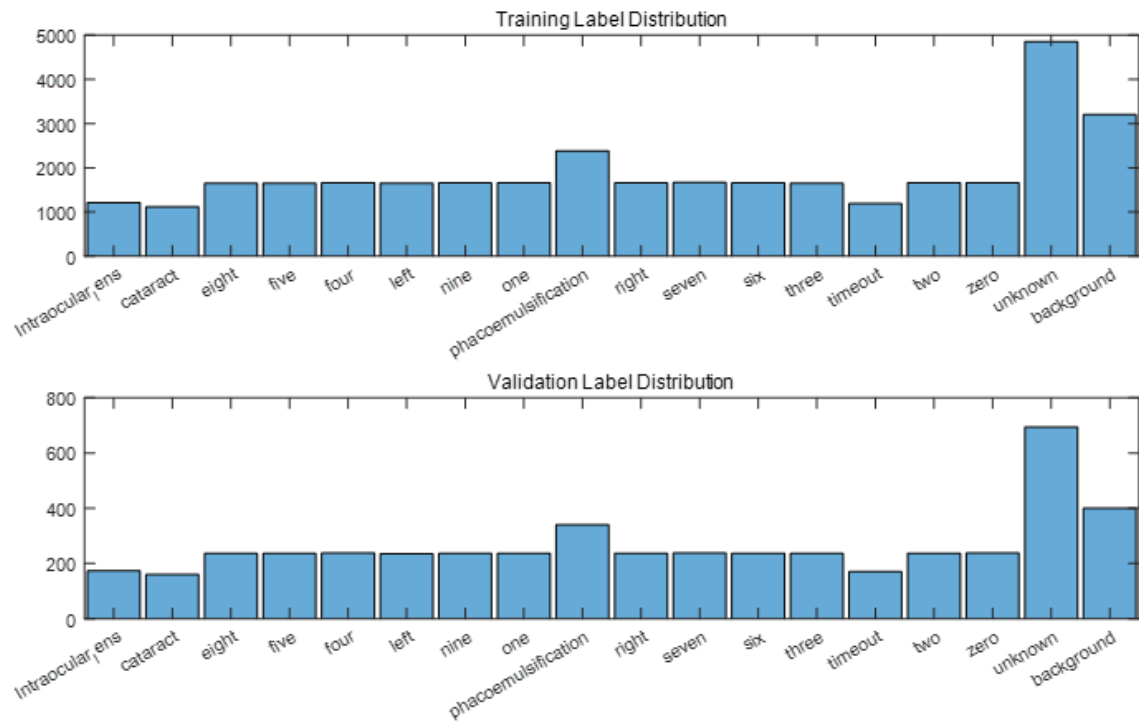

Supplement: pone.0231322.s002.pdf [file pone.0231322.s002.pdf]
